# Supplementary material for: A reproducible systematic map of research on the illusory truth effect
Source: PubMed Central journal article supplement (PMC9166874; doi:10.3758/s13423-021-01995-w), 2021-10-27
Supplement: 13423_2021_1995_MOESM1_ESM.pdf [file 13423_2021_1995_MOESM1_ESM.pdf]

Appendix A  
Benchmark List

1. Begg, I., Anas, A., & Farinacci, S. (1992). *Dissociation of processes in belief: Source recollection, statement familiarity, and the illusion of truth*. *Journal of Experimental Psychology: General*, 121, 446-458.
2. Brown, A. S., & Nix, L. A. (1996). Turning lies into truths: Referential validation of falsehoods. *Journal of Experimental Psychology: Learning, Memory, and Cognition*, 22, 1088-1100.
3. Dechêne, A., Stahl, C., Hansen, J., & Wänke, M. (2009). Mix Me a list: Context moderates the truth effect and the mere exposure effect. *Journal of Experimental Social Psychology*, 45, 1117-1122.
4. Dechêne, A., Stahl, C., Hansen, J., & Wänke, M. (2010). The truth about the truth: A meta-analytic review of the truth effect. *Personality and Social Psychology Review*, 14, 238-257.
5. Fazio, L. K., Brashier, N. M., Payne, B. K., & Marsh, E. J. (2015). Knowledge does not protect against illusory truth. *Journal of Experimental Psychology: General*, 144, 993-1002.
6. Garcia-Marques, T., Silva, R. R., & Mello, J. (2017). Asking simultaneously about truth and familiarity may disrupt truth effects. *Análise Psicológica*, 35, 61-71.
7. Hawkins, S. A., & Hoch, S. J. (1992). Low-involvement learning: Memory without evaluation. *Journal of Consumer Research*, 19, 212-225.
8. Hawkins, S. A., Hoch, S. J., & Meyers Levy, J. (2001). Low-involvement learning: Repetition and coherence in familiarity and belief. *Journal of Consumer Psychology*, 11, 1-11.
9. Law, S., Hawkins, S. A., & Craik, F. I. M. (1998). Repetition-induced belief in the elderly: Rehabilitating age-related memory deficits. *Journal of Consumer Research*, 25, 91-107.
10. Mitchell, J. P., Dodson, C. S., & Schacter, D. L. (2005). fMRI evidence for the role of recollection in suppressing misattribution errors: The illusory truth effect. *Journal of Cognitive Neuroscience*, 17, 800-810.

11. Mitchell, J. P., Sullivan, A. L., Schacter, D. L., & Budson, A. E. (2006). Misattribution errors in Alzheimer's disease: The illusory truth effect. *Neuropsychology*, 20, 185-192.
12. Mutter, S. A., Lindsey, S. E., & Pliske, R. M. (1995). Aging and credibility judgment. *Aging and Cognition*, 2, 89-107.
13. Nadarevic, L., & Erdfelder, E. (2014). Initial judgment task and delay of the final validity-rating task moderate the truth effect. *Consciousness and Cognition*, 23, 74-84.
14. Nadarevic, L., Plier, S., Thielmann, I., & Darancó, S. (2018). Foreign language reduces the longevity of the repetition-based truth effect. *Acta psychologica*, 191, 149-159.
15. Pennycook, G., Cannon, T. D., & Rand, D. G. (2018). Prior exposure increases perceived accuracy of fake news. *Journal of Experimental Psychology: General*, 147, 1865–1880.
16. Roggeveen, A. L., & Johar, G. V. (2002). Perceived source variability versus familiarity: Testing competing explanations for the truth effect. *Journal of Consumer Psychology*, 12, 81-91.
17. Scholl, S. G., Greifeneder, R., & Bless, H. (2014). When fluency signals truth: Prior successful reliance on fluency moderates the impact of fluency on truth judgments. *Journal of Behavioral Decision Making*, 27, 268-280.
18. Schwartz, M. (1982). Repetition and rated truth value of statements. *American Journal of Psychology*, 95, 393-407.
19. Silva, R. R., Garcia-Marques, T., & Mello, J. (2016). The differential effects of fluency due to repetition and fluency due to color contrast on judgments of truth. *Psychological Research*, 80, 821-837.
20. Unkelbach, C. (2007). Reversing the truth effect: Learning the interpretation of processing fluency in judgments of truth. *Journal of Experimental Psychology: Learning, Memory, and Cognition*, 33, 219-230.

## Appendix B Bibliographic Database and Grey Literature Searches

Bibliographic database searches were conducted with “apply equivalent subjects/map term to subject heading” de-selected.

### **Business Source Premier**

**Field:** “Abstract or author-supplied abstract”

**Using** “Advanced Search”

**Search string:** ( "illusory truth" OR "illusion\* of truth" OR "induced truth effect" OR "reiteration effect" OR "tainted truth effect" OR “repetition based truth effect” OR “repetition induced increases” OR repeat OR repeated OR repeating OR repetition OR "prior exposure" ) AND AB ( true\* OR truth OR "truth effect\*" OR belief ) AND AB ( statement\* OR items OR stimulus OR stimuli OR claim\* OR judgment\* OR judgement\* OR rating\* OR "subjective truth" OR "truth value" OR “judged validity” OR “validity ratings” OR "processing fluency" OR "fluency effect\*" OR "perceptual fluency" )

**Search modes** - Boolean/Phrase

Searching: **Business Source Premier** | [Choose Databases](#)

Suggest Subject Terms

( "illusory truth" OR "illusion\* of truth" ) AND AB Abstract or Author-Supplied Abstract

Search

AND Select a Field (optional) Clear ?

AND Select a Field (optional) + -

[Basic Search](#) [Advanced Search](#) [Search History](#)

### **EconLit**

**Field:** “Abstract”

**Using** “Advanced Search”

**Search string:** ( "illusory truth" OR "illusion\* of truth" OR "induced truth effect" OR "reiteration effect" OR "tainted truth effect" OR “repetition based truth effect” OR “repetition induced increases” OR repeat OR repeated OR repeating OR repetition OR "prior exposure" ) AND AB ( true\* OR truth OR "truth effect\*" OR belief ) AND AB ( statement\* OR items OR stimulus OR stimuli OR claim\* OR judgment\* OR judgement\* OR rating\* OR "subjective truth" OR "truth value" OR “judged validity” OR “validity ratings” OR "processing fluency" OR "fluency effect\*" OR "perceptual fluency" )

**Search modes** - Boolean/Phrase

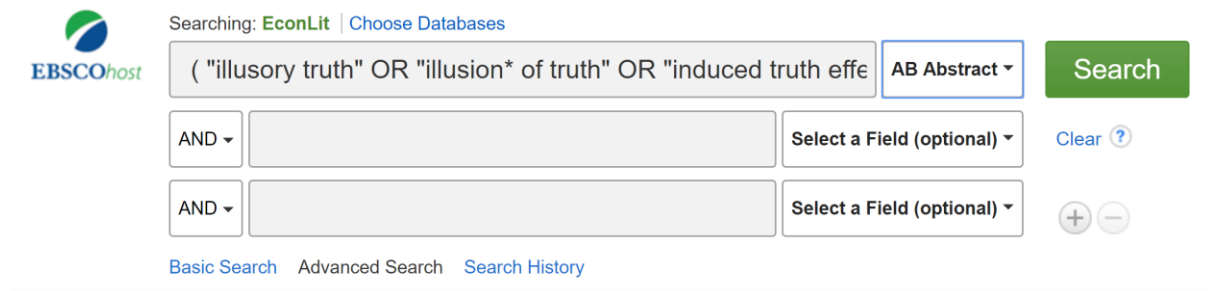

Searching: [EconLit](#) | [Choose Databases](#)

( "illusory truth" OR "illusion\* of truth" OR "induced truth effe" **AB Abstract** **Search**

AND  Select a Field (optional) [Clear](#) ?

AND  Select a Field (optional) [+](#) [-](#)

[Basic Search](#) [Advanced Search](#) [Search History](#)

## ERIC

**Field:** "Abstract"

Using "Advanced Search"

**Search string:** ( "illusory truth" OR "illusion\* of truth" OR "induced truth effect" OR "reiteration effect" OR "tainted truth effect" OR "repetition based truth effect" OR "repetition induced increases" OR repeat OR repeated OR repeating OR repetition OR "prior exposure" ) AND AB ( true\* OR truth OR "truth effect\*" OR belief ) AND AB ( statement\* OR items OR stimulus OR stimuli OR claim\* OR judgment\* OR judgement\* OR rating\* OR "subjective truth" OR "truth value" OR "judged validity" OR "validity ratings" OR "processing fluency" OR "fluency effect\*" OR "perceptual fluency" )

**Search modes** - Boolean/Phrase

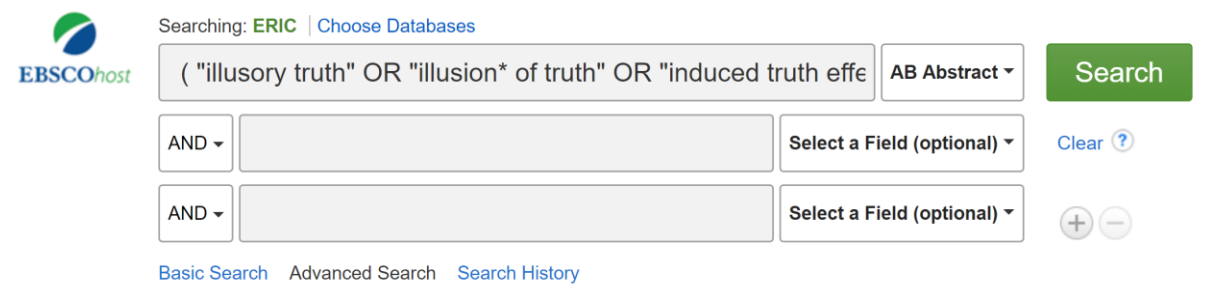

Searching: [ERIC](#) | [Choose Databases](#)

( "illusory truth" OR "illusion\* of truth" OR "induced truth effe" **AB Abstract** **Search**

AND  Select a Field (optional) [Clear](#) ?

AND  Select a Field (optional) [+](#) [-](#)

[Basic Search](#) [Advanced Search](#) [Search History](#)

## PsycINFO

**Field:** "Abstracts"

Using "Advanced Search"

**Search string:** (( "illusory truth" OR "illusion\* of truth" OR "induced truth effect" OR "reiteration effect" OR "tainted truth effect" OR "repetition based truth effect" OR "repetition induced increases" OR repeat OR repeated OR repeating OR repetition OR "prior exposure" ) AND ( true\* OR truth OR "truth effect\*" OR belief ) AND ( statement\* OR items OR stimulus OR stimuli OR claim\* OR judgment\* OR judgement\* OR rating\* OR "subjective truth" OR "truth value" OR "judged validity" OR "validity ratings" OR "processing fluency" OR "fluency effect\*" OR "perceptual fluency" ))

[Basic Search](#) | [Find Citation](#) | [Search Tools](#) | [Search Fields](#) | **Advanced Search** | [Multi-Field Search](#)

1 Resource selected | [Hide](#) | [Change](#)

**PsycINFO** 1806 to October Week 1 2019

Enter keyword or phrase  
(\* or \$ for truncation)

**Keyword**  Author  Title  Journal

▼ **Limits** *(close)*

Include Multimedia  Map Term to Subject Heading

- Full Text
- Latest Update
- Abstracts
- Impact Statement
- PsycARTICLES Journals
- Human
- Test DOI
- All Journals
- English Language
- Open Access

Publication Year  -

---

**PubMed**

**Field:** "Title/Abstract"

**Using** "Advanced Search Builder"

**Search string:** "illusory truth" OR "illusion\* of truth" OR "induced truth effect" OR "reiteration effect" OR "tainted truth effect" OR "repetition based truth effect" OR "repetition induced increases" OR repeat OR repeated OR repeating OR repetition OR "prior exposure"

AND true\* OR truth OR "truth effect\*" OR belief

AND statement\* OR items OR stimulus OR stimuli OR claim\* OR judgment\* OR judgement\* OR rating\* OR "subjective truth" OR "truth value" OR "judged validity" OR "validity ratings" OR "processing fluency" OR "fluency effect\*" OR "perceptual fluency"

```
((("illusory truth"[Title/Abstract] OR "illusion* of truth"[Title/Abstract] OR "induced truth effect"[Title/Abstract] OR "reiteration effect"[Title/Abstract] OR "tainted truth effect"[Title/Abstract] OR "repetition based truth effect"[Title/Abstract] OR "repetition induced increases"[Title/Abstract] OR repeat[Title/Abstract] OR repeated[Title/Abstract] OR repeating[Title/Abstract] OR repetition[Title/Abstract] OR "prior exposure"[Title/Abstract])) AND (true*[Title/Abstract] OR truth[Title/Abstract] OR "truth effect*" [Title/Abstract] OR belief[Title/Abstract])) AND (statement*[Title/Abstract] OR items[Title/Abstract] OR stimulus[Title/Abstract] OR stimuli[Title/Abstract] OR claim*[Title/Abstract] OR judgment*[Title/Abstract] OR judgement*[Title/Abstract] OR rating*[Title/Abstract] OR "subjective truth"[Title/Abstract] OR "truth value"[Title/Abstract] OR "judged validity"[Title/Abstract] OR "validity ratings"[Title/Abstract] OR "processing fluency"[Title/Abstract] OR "fluency effect*" [Title/Abstract] OR "perceptual fluency"[Title/Abstract])
```

[Edit](#)

[Clear](#)

**Builder**

|                                             |                                                                                                                                              |                                                                                                                 |                                    |                                 |
|---------------------------------------------|----------------------------------------------------------------------------------------------------------------------------------------------|-----------------------------------------------------------------------------------------------------------------|------------------------------------|---------------------------------|
| <input type="text" value="Title/Abstract"/> | <input \"illusion*="" \"induced="" \"reiteration="" \"ta"="" effect\"="" illusory="" of="" or="" truth="" truth\"="" type="text" value="\"/> | <input type="button" value="⊖"/>                                                                                | <a href="#">Show index list</a>    |                                 |
| AND ▼                                       | <input type="text" value="Title/Abstract"/>                                                                                                  | <input belief"="" effect*\"="" or="" truth="" type="text" value="true* OR truth OR \"/>                         | <input type="button" value="⊖"/>   | <a href="#">Show index list</a> |
| AND ▼                                       | <input type="text" value="Title/Abstract"/>                                                                                                  | <input type="text" value="statement* OR items OR stimulus OR stimuli OR claim* OR judgment* OR judgement* OR"/> | <input type="button" value="⊖"/>   | <a href="#">Show index list</a> |
| AND ▼                                       | <input type="text" value="All Fields"/>                                                                                                      | <input type="text" value=""/>                                                                                   | <input type="button" value="⊖ ⊕"/> | <a href="#">Show index list</a> |

or [Add to history](#)

---

**Scopus****Field:** "Article title, Abstract, Keywords"**Using** "Advanced Search"

**Search string:** TITLE-ABS-KEY((((("illusory truth" OR "illusion\* of truth" OR "induced truth effect" OR "reiteration effect" OR "tainted truth effect" OR "repetition based truth effect" OR "repetition induced increases" OR repeat OR repeated OR repeating OR repetition OR "prior exposure") AND (true\* OR truth OR "truth effect\*" OR belief) AND (statement\* OR items OR stimulus OR stimuli OR claim\* OR judgment\* OR judgement\* OR rating\* OR "subjective truth" OR "truth value" OR "judged validity" OR "validity ratings" OR "processing fluency" OR "fluency effect\*" OR "perceptual fluency")))))))

Documents  Authors  Affiliations Advanced

[Search tips ?](#)[Enter query string](#)

TITLE-ABS-KEY((((("illusory truth" OR "illusion\* of truth" OR "induced truth effect" OR "reiteration effect" OR "tainted truth effect" OR "repetition based truth effect" OR "repetition induced increases" OR repeat OR repeated OR repeating OR repetition OR "prior exposure") AND (true\* OR truth OR "truth effect\*" OR belief) AND (statement\* OR items OR stimulus OR stimuli OR claim\* OR judgment\* OR judgement\* OR rating\* OR "subjective truth" OR "truth value" OR "judged validity" OR "validity ratings" OR "processing fluency" OR "fluency effect\*" OR "perceptual fluency")))))))

[Outline query](#) [Add Author name / Affiliation](#) [Clear form](#)

[Search Q](#)**Web of Science****Field:** "Topic"**Using** "Basic Search"

**Search string:** (((("illusory truth" OR "illusion\* of truth" OR "induced truth effect" OR "reiteration effect" OR "tainted truth effect" OR "repetition based truth effect" OR "repetition induced increases" OR repeat OR repeated OR repeating OR repetition OR "prior exposure") AND (true\* OR truth OR "truth effect\*" OR belief) AND (statement\* OR items OR stimulus OR stimuli OR claim\* OR judgment\* OR judgement\* OR rating\* OR "subjective truth" OR "truth value" OR "judged validity" OR "validity ratings" OR "processing fluency" OR "fluency effect\*" OR "perceptual fluency")))))))

**Timespan:** All years. **Databases:** WOS, BCI, BIOSIS, KJD, MEDLINE, RSCI, SCIELO.

Search language=Auto

Select a database [Basic Search](#)[Cited Reference Search](#)[Advanced Search](#)[Search](#)[+ Add row](#) | [Reset](#)

Timespan

---

**Google Scholar (via Harzing's Publish or Perish)**

Google Scholar searches will be combined and deduplicated before being added to the master spreadsheet.

Search 1:

Title words "illusory truth"

| Google Scholar search |                      |
|-----------------------|----------------------|
| Authors:              | <input type="text"/> |
| Publication name:     | <input type="text"/> |
| Title words:          | "illusory truth"     |
| Keywords:             | <input type="text"/> |

Search 2:

Title words "truth effect"

| Google Scholar search |                      |
|-----------------------|----------------------|
| Authors:              | <input type="text"/> |
| Publication name:     | <input type="text"/> |
| Title words:          | "truth effect"       |
| Keywords:             | <input type="text"/> |

Search 3:

Title words "truth judgement"

| Google Scholar search |                      |
|-----------------------|----------------------|
| Authors:              | <input type="text"/> |
| Publication name:     | <input type="text"/> |
| Title words:          | "truth judgement"    |
| Keywords:             | <input type="text"/> |

Search 4:

Title words "truth judgment"

| Google Scholar search |                      |
|-----------------------|----------------------|
| Authors:              | <input type="text"/> |
| Publication name:     | <input type="text"/> |
| Title words:          | "truth judgment"     |
| Keywords:             | <input type="text"/> |

Search 5:

Keywords "illusory truth"

| Google Scholar search |                      |
|-----------------------|----------------------|
| Authors:              | <input type="text"/> |
| Publication name:     | <input type="text"/> |
| Title words:          | <input type="text"/> |
| Keywords:             | "illusory truth"     |

---

**Grey Literature Databases:** OpenGrey, PsyArXiv, Curate Science, PsychFileDrawer, DART-Europe, EthOS, ProQuest Dissertation & Theses Global, Thesis Commons

Search 1: "illusory truth"

Search 2: "truth effect"

Search 3: "truth judgement"

Search 4: "truth judgment"



## Appendix C

## References Included in Full-text Database

|    | <b>Author</b>                                                                                      | <b>Year</b> | <b>Title</b>                                                                                                                                                                     |
|----|----------------------------------------------------------------------------------------------------|-------------|----------------------------------------------------------------------------------------------------------------------------------------------------------------------------------|
| 01 | Arkes, H.R., Hackett, C., Boehm, L.                                                                | 1989a       | The generality of the relation between familiarity and judged validity                                                                                                           |
| 02 | Arkes, H. R., Nash, J. G., & Joyner, C. A.                                                         | 1989b       | Solving a word puzzle makes subsequent statements containing the word seem more valid                                                                                            |
| 03 | Arkes, Hal R; Boehm, Lawrence E; Xu, Gang                                                          | 1991        | Determinants of judged validity                                                                                                                                                  |
| 04 | Arkes, H. R., Nash, J. G., & Joyner, C. A.                                                         | 1993        | Replication of solving a word puzzle makes subsequent statements containing the word seem more valid                                                                             |
| 05 | Bacon, F.T.                                                                                        | 1979        | Credibility of repeated statements: Memory for trivia                                                                                                                            |
| 06 | Bechkoff, J. R.                                                                                    | 2008        | Proprioception and the truth effect: A case in favor of the cartesian model of information processing                                                                            |
| 07 | Begg, I., Armour, V., & Kerr, T.                                                                   | 1985        | On believing what we remember                                                                                                                                                    |
| 08 | Begg, I., & Armour, V.                                                                             | 1991        | Repetition and the ring of truth: Biasing comments                                                                                                                               |
| 09 | Begg, I., Anas, A., & Farinacci, S.                                                                | 1992        | Dissociation of processes in belief: Source recollection, statement familiarity, and the illusion of truth                                                                       |
| 10 | Béna, J., Carreras, O., Terrier, P.                                                                | 2019a       | Attention division and the truth effect: A case of moderation by source credibility manipulation                                                                                 |
| 11 | Béna, J., Carreras, O., Terrier, P.                                                                | 2019b       | Delay between exposure and truth judgement decreases the truth effect in a one judgement procedure                                                                               |
| 12 | Béna, J., Carreras, O., Terrier, P.                                                                | 2020        | Does delay between exposure and truth judgement decrease the truth effect through a recollection impairment? A Remember/Know study                                               |
| 13 | Boehm, L. E.                                                                                       | 1994        | The validity effect: A search for mediating variables                                                                                                                            |
| 14 | Brashier, N. M., Umanath, S., Cabeza, R., & Marsh, E. J.                                           | 2017        | Competing cues: Older adults rely on knowledge in the face of fluency                                                                                                            |
| 15 | Brashier, N. M., Eliseev, E. D., & Marsh, E. J.                                                    | 2020        | An initial accuracy focus prevents illusory truth                                                                                                                                |
| 16 | Brown, A. S.; Nix, L. A.                                                                           | 1996        | Turning lies into truths: Referential validation of falsehoods                                                                                                                   |
| 17 | Calio, F.                                                                                          | 2019        | Untersuchungen zur zeitlichen stabilität und zur vermeidbarkeit der wahrheitsillusion [Investigations into the temporal stability and the avoidability of the illusion of truth] |
| 18 | Chang, Y.                                                                                          | 2019        | Is the plausibility account of the illusion of truth effect plausible?                                                                                                           |
| 19 | Corneille, O., Mierop, A., & Unkelbach, C.                                                         | 2020        | Repetition increases both the perceived truth and fakeness of information: An ecological account                                                                                 |
| 20 | De keersmaecker, J.; Dunning, D.; Pennycook, G.; Rand, D.G.; Sanchez, C.; Unkelbach, C.; Roets, A. | 2020        | Investigating the robustness of the illusory truth effect across individual differences in cognitive ability, need for cognitive closure, and cognitive style.                   |
| 21 | Dechêne, A., Stahl, C., Hansen, J., & Wänke, M.                                                    | 2009        | Mix me a list: Context moderates the truth effect and the mere-exposure effect                                                                                                   |
| 22 | DiFonzo, N., Beckstead, J. W., Stupak, N., & Walders, K.                                           | 2016        | Validity judgments of rumors heard multiple times: The shape of the truth effect                                                                                                 |

|    |                                                              |              |                                                                                                                     |
|----|--------------------------------------------------------------|--------------|---------------------------------------------------------------------------------------------------------------------|
| 23 | Doland, C. A.                                                | 1999         | Repeating is believing: an investigation of the illusory truth effect                                               |
| 24 | Ecker, U., Lewandowsky, S., & Chadwick, M.                   | 2020         | Can corrections spread misinformation to new audiences? Testing for the elusive familiarity backfire effect         |
| 25 | Effron, D. A., & Raj, M.                                     | 2020         | Misinformation and morality: encountering fake-news headlines makes them seem less unethical to publish and share   |
| 26 | Fazio, L. K., Brashier, N. M., Payne, B. K., & Marsh, E. J.  | 2015         | Knowledge does not protect against illusory truth                                                                   |
| 27 | Fazio, L., & Sherry, C.                                      | 2019a        | The effect of repetition on truth judgments across development                                                      |
| 28 | Fazio, Lisa K; Rand, David G; Pennycook, Gordon              | 2019b        | Repetition increases perceived truth equally for plausible and implausible statements                               |
| 29 | Fazio, L. K.,                                                | 2020a        | Repetition increases perceived truth even for known falsehoods                                                      |
| 30 | Fazio, L. K.                                                 | 2020b        | Preventing the illusory truth effect: When repetition does not increase perceived truth                             |
| 31 | Frances, C.; Costa, A.; Baus, C.                             | 2018         | On the effects of regional accents on memory and credibility                                                        |
| 32 | Garcia-Marques, T., Silva, R. R., Reber, R., & Unkelbach, C. | 2015         | Hearing a statement now and believing the opposite later                                                            |
| 33 | Garcia-Marques, T., Silva, R. R., & Mello, J.                | 2016a        | Judging the truth-value of a statement in and out of a deep processing context                                      |
| 34 | Garcia-Marques, T., Prada, M., & Mackie, D. M.               | 2016b        | Familiarity increases subjective positive affect even in non-affective and non-evaluative contexts                  |
| 35 | Garcia-Marques, T.; Silva, R.R.; Mello, J.                   | 2017         | Asking simultaneously about truth and familiarity may disrupt truth effects                                         |
| 36 | Garcia-Marques, T., Silva, R. R., Mello, J., & Hansen, J.    | 2019         | Relative to what? Dynamic updating of fluency standards and between-participants illusions of truth                 |
| 37 | Gigerenzer, G.                                               | 1984         | External validity of laboratory experiments: The frequency-validity relationship                                    |
| 38 | Hasher, L., Goldstein, D., & Toppino, T.                     | 1977         | Frequency and the conference of referential validity                                                                |
| 39 | Hawkins, S. A., & Hoch, S. J.                                | 1992         | Low-involvement learning: Memory without evaluation                                                                 |
| 40 | Hawkins, S. A., Hoch, S. J., & Meyers-Levy, J.               | 2001         | Low-involvement learning: Repetition and coherence in familiarity and belief                                        |
| 41 | Hernández Vera, A. V.                                        | 2020         | El efecto de la repetición sobre la percepción de veracidad de frases: un estudio sobre la ilusión de verdad.       |
| 42 | Jackson, D. R.                                               | 2018         | Ethics in fake news: combatting the illusory truth effect with corrections                                          |
| 43 | Jalbert M., Newman E., & Schwarz N.                          | 2016         | Trivia claim truth effect                                                                                           |
| 44 | Jalbert M., Newman E., & Schwarz N.                          | under review | Only half of what I'll tell you is true: How experimental procedures lead to an underestimation of the truth effect |
| 45 | Kim, C.                                                      | 2002         | The role of individual differences in general skepticism in the illusory truth effect                               |
| 46 | Ladowsky-Brooks, R. L.                                       | 2010         | The truth effect in relation to neuropsychological functioning in traumatic brain injury                            |
| 47 | Law, S., & Hawkins, S. A.                                    | 1997         | Advertising repetition and consumer beliefs: The role of source memory                                              |
| 48 | Law, S.                                                      | 1998a        | Do we believe what we remember or, do we remember what we believe?                                                  |
| 49 | Law, S.                                                      | 1998b        | Investigating the truth effect in young and elderly consumers: The role of recognition and source memory            |

|    |                                                                                    |       |                                                                                                                                                                         |
|----|------------------------------------------------------------------------------------|-------|-------------------------------------------------------------------------------------------------------------------------------------------------------------------------|
| 50 | Law, S., Hawkins, S. A., & Craik, F. I.                                            | 1998c | Repetition-induced belief in the elderly: Rehabilitating age-related memory deficits                                                                                    |
| 51 | Lindsey, S.                                                                        | 1994  | Aging and the truth effect in validity judgment                                                                                                                         |
| 52 | Mitchell, J. P.                                                                    | 2003  | Asymmetries in the processing of true and false information                                                                                                             |
| 53 | Mitchell, J. P., Dodson, C. S., & Schacter, D. L.                                  | 2005  | fMRI evidence for the role of recollection in suppressing misattribution errors: The illusory truth effect                                                              |
| 54 | Mitchell, J. P., Sullivan, A. L., Schacter, D. L., & Budson, A. E.                 | 2006  | Misattribution errors in Alzheimer's disease: The illusory truth effect                                                                                                 |
| 55 | Moritz, S., Köther, U., Woodward, T. S., Veckenstedt, R., Dechêne, A., & Stahl, C. | 2012  | Repetition is good? An internet trial on the illusory truth effect in schizophrenia and nonclinical participants                                                        |
| 56 | Murray, S., Stanley, M., McPhetres, J., Pennycook, G., & Seli, P.                  | 2020  | "I've said it before and I will say it again": Repeating statements made by Donald Trump increases perceived truthfulness for individuals across the political spectrum |
| 57 | Mutter, S. A., Lindsey, S. E., & Pliske, R. M.                                     | 1995  | Aging and credibility judgment                                                                                                                                          |
| 58 | Nadarevic, L.                                                                      | 2007  | A failed replication of the truth effect                                                                                                                                |
| 59 | Nadarevic, L. & Rinnewitz, L.                                                      | 2011  | Judgment mode instructions do not moderate the truth effect                                                                                                             |
| 60 | Nadarevic, L.; Meckler, D.; Schmidt, A.                                            | 2012  | Are there interindividual differences of the truth effect? An investigation of different personality traits                                                             |
| 61 | Nadarevic, L.; Erdfelder, E.                                                       | 2014  | Initial judgment task and delay of the final validity-rating task moderate the truth effect                                                                             |
| 62 | Nadarevic, L., & Aßfalg, A.                                                        | 2017  | Unveiling the truth: warnings reduce the repetition-based truth effect                                                                                                  |
| 63 | Nadarevic, L., Plier, S., Thielmann, I., & Darancó, S.                             | 2018  | Foreign language reduces the longevity of the repetition-based truth effect                                                                                             |
| 64 | Newman, E. J., Jalbert, M. C., Schwarz, N., & Ly, D. P.                            | 2020  | Truthiness, the illusory truth effect, and the role of need for cognition                                                                                               |
| 65 | Oğuz Taşbaş, E. H., Unkelbach, C.,                                                 | 2020b | Repetition effect and decision making                                                                                                                                   |
| 66 | Pennycook, G., & Rand, D. G.                                                       | 2017  | The illusory truth effect for fake news is similar regardless of format                                                                                                 |
| 67 | Pennycook, G., Cannon, T. D., & Rand, D. G.                                        | 2018  | Prior exposure increases perceived accuracy of fake news                                                                                                                |
| 68 | Polage, D.C.                                                                       | 2012  | Making up history: False memories of fake news stories                                                                                                                  |
| 69 | Reyes de Luna, B.                                                                  | 2018  | La formación de nuestras creencias: Efecto ilusorio de la verdad [The Formation of our beliefs: The illusory truth effect]                                              |
| 70 | Roggeveen, A. L., & Johar, G. V.                                                   | 2002  | Perceived source variability versus familiarity: Testing competing explanations for the truth effect                                                                    |
| 71 | Schwartz, Marian                                                                   | 1982  | Repetition and rated truth value of statements                                                                                                                          |
| 72 | Silva, R. R., Garcia-Marques, T., & Mello, J.                                      | 2016  | The differential effects of fluency due to repetition and fluency due to color contrast on judgments of truth                                                           |
| 73 | Silva, R. R., Garcia-Marques, T., & Reber, R.                                      | 2017  | The informative value of type of repetition: Perceptual and conceptual fluency influences on judgments of truth                                                         |
| 74 | Sim, R.                                                                            | 2010  | Memory mistakes and aging: How susceptibility to false recognition and the illusory truth effect changes across the lifespan                                            |
| 75 | Skurnik, I. W.                                                                     | 1998  | Metacognition and the illusion of truth                                                                                                                                 |
| 76 | Skurnik, I., Yoon, C., Park, D. C., & Schwarz, N.                                  | 2005  | How warnings about false claims become recommendations                                                                                                                  |

|    |                                                                       |       |                                                                                                                                        |
|----|-----------------------------------------------------------------------|-------|----------------------------------------------------------------------------------------------------------------------------------------|
| 77 | Srull, T. K.                                                          | 1983  | The role of prior knowledge in the acquisition, retention, and use of new information                                                  |
| 78 | Stanley, M. L., Yang, B. W., & Marsh, E. J.                           | 2019  | When the unlikely becomes likely: Qualifying language does not influence later truth judgments                                         |
| 79 | Sundar, A.; Kardes, F.R.; Wright, S.A.                                | 2015  | The influence of repetitive health messages and sensitivity to fluency on the truth effect in advertising                              |
| 80 | Toppino, T. C., Robertshaw, W., Hasher, L., & Goldstein, D.           | 1977  | Frequency of occurrence and judgments of truth and falsity                                                                             |
| 81 | Toppino, T.C.; Ann Brochin, H.                                        | 1989  | Learning from tests: The case of true-false examinations                                                                               |
| 82 | Toppino, T.C.; Luipersbeck, S.M.                                      | 1993  | Generality of the negative suggestion effect in objective tests                                                                        |
| 83 | Ulenaers, W., Pieters, R., & Warlop, L.                               | 2000  | Felt expertise and the truth effect                                                                                                    |
| 84 | Unkelbach, C.                                                         | 2007  | Reversing the truth effect: Learning the interpretation of processing fluency in judgments of truth                                    |
| 85 | Unkelbach, C., & Stahl, C.                                            | 2009  | A multinomial modeling approach to dissociate different components of the truth effect                                                 |
| 86 | Unkelbach, C., Bayer, M., Alves, H., Koch, A., & Stahl, C.            | 2011  | Fluency and positivity as possible causes of the truth effect                                                                          |
| 87 | Unkelbach, C., & Rom, S. C.                                           | 2017  | A referential theory of the repetition-induced truth effect                                                                            |
| 88 | Unkelbach, C.; Greifeneder, R.                                        | 2018  | Experiential fluency and declarative advice jointly inform judgments of truth                                                          |
| 89 | Unkelbach, C., & Speckmann, F.                                        | 2020a | Acting on illusory truth despite knowing better                                                                                        |
| 90 | Unkelbach                                                             | 2020b | Knowledge does partially protect against illusory truth: The case of information related to the Corona crisis                          |
| 91 | Vicari, S. M.                                                         | 2016  | Overcoming the illusory truth effect: The influence of contextual details on memory monitoring                                         |
| 92 | Vogel, Tobias; Silva, Rita R; Thomas, Aurelia; Wanke, Michaela        | 2020  | Truth is in the mind, but beauty is in the eye: Fluency effects are moderated by a match between fluency source and judgment dimension |
| 93 | Wang, W. C., Brashier, N. M., Wing, E. A., Marsh, E. J., & Cabeza, R. | 2016  | On known unknowns: Fluency and the neural mechanisms of illusory truth                                                                 |

## Appendix D

## Summary of Statcheck Issues

| N errors       | N papers | % papers | N decision<br>errors | N papers | % papers |
|----------------|----------|----------|----------------------|----------|----------|
| 0              | 31       | 33.3     | 0                    | 53       | 57       |
| 1              | 12       | 12.9     | 1                    | 2        | 2.2      |
| 2              | 8        | 8.66     | 3                    | 2        | 2.2      |
| 3              | 2        | 2.2      |                      |          |          |
| 4              | 1        | 1.1      |                      |          |          |
| 5              | 2        | 2.2      |                      |          |          |
| 9              | 1        | 1.1      |                      |          |          |
| Unable to read | 36       | 38.7     |                      |          |          |

*Note.* Statcheck recomputes p-values and compares them to those reported in the text. Inconsistent p-values are recorded as an “error”. If the reported result is significant and the recomputed result is not, or vice versa, the result is recorded as a “decision error”.
